# Supplementary material
Source: MDPI journal article supplement (https://www.mdpi.com/1999-4907/13/12/2106)
Supplement: s1 [file s1 › forests-1952365-supplementary.pdf]

**Table S1.** Structure data of tree species sampled in in the Southern Urals.  
Values are means  $\pm$  SD.

| Variables                       | Altitudinal level | Taganay         | Nurgush         | Iremel          |
|---------------------------------|-------------------|-----------------|-----------------|-----------------|
| Height (m)                      | High              | 0.62 $\pm$ 0.04 | 0.63 $\pm$ 0.05 | 0.77 $\pm$ 0.06 |
|                                 | Mid               | 0.86 $\pm$ 0.07 | 1.18 $\pm$ 0.14 | 0.93 $\pm$ 0.05 |
|                                 | Low               | -               | -               | -               |
| Crown diameter (m)              | High              | 0.51 $\pm$ 0.04 | 0.56 $\pm$ 0.08 | 0.74 $\pm$ 0.06 |
|                                 | Mid               | 0.56 $\pm$ 0.04 | 1.23 $\pm$ 0.17 | 0.76 $\pm$ 0.05 |
|                                 | Low               | -               | -               | -               |
| Density (ind ha <sup>-1</sup> ) | High              | 775             | 1083            | 950             |
|                                 | Mid               | 3820            | 1060            | 1412            |
|                                 | Low               | -               | -               | -               |

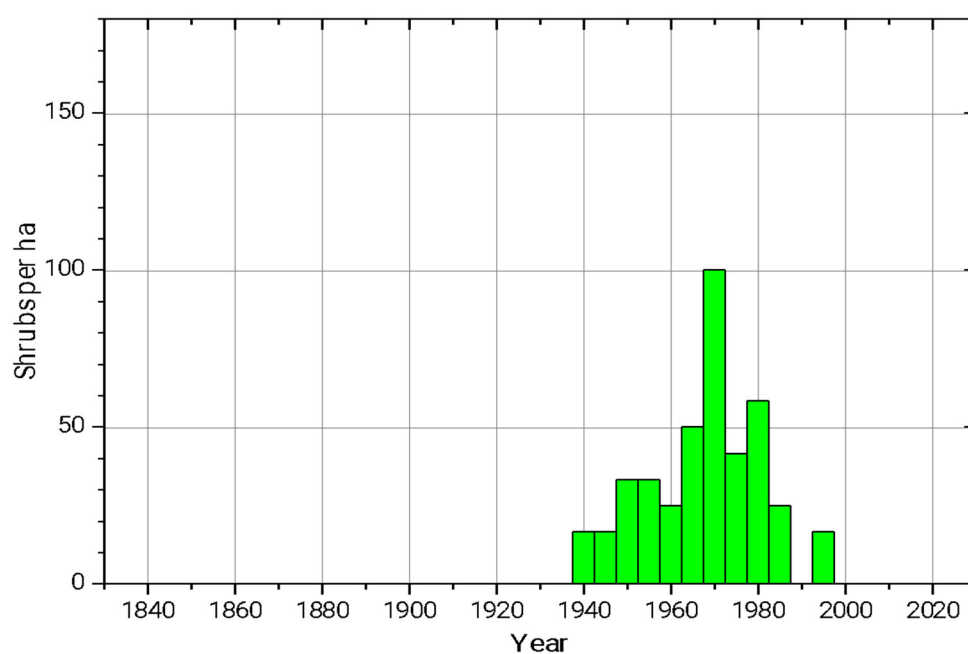

**Figure S1.** Age structures of *J. sibirica* at high altitudinal level in Molebnyi Kamen', Northern Urals.

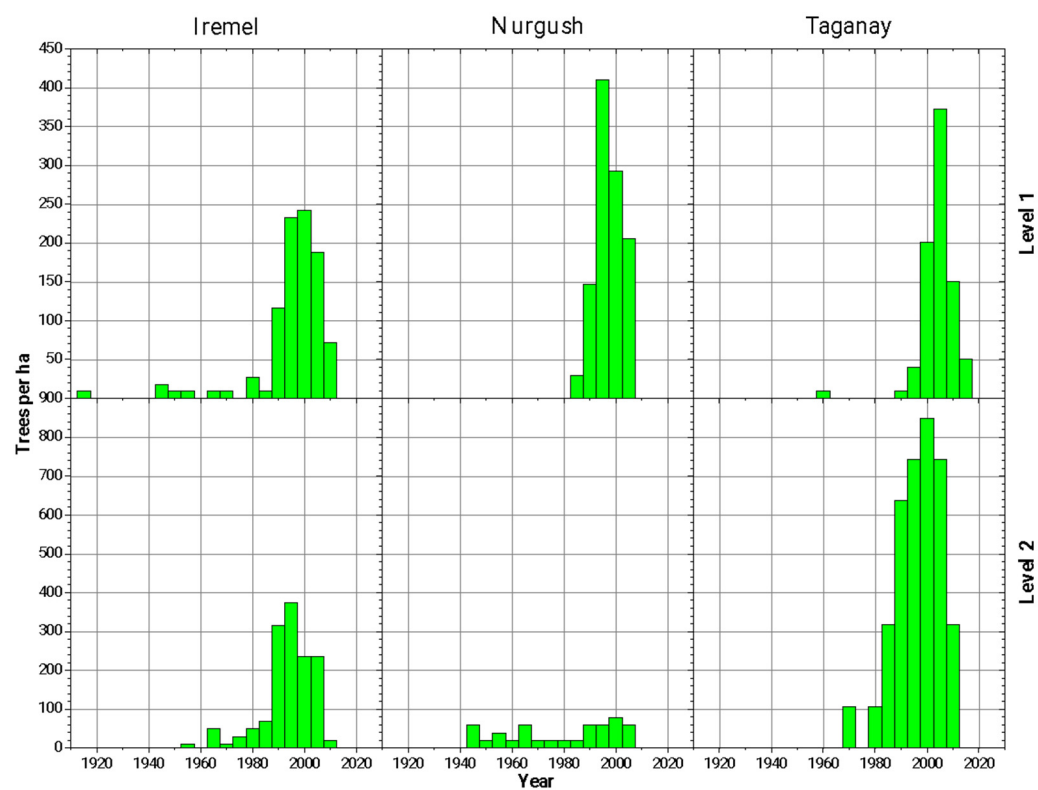

**Figure S2.** Age structures of trees in the Southern Urals study areas, excepting Zigalga where no trees were found in the sampled plots. Levels 1 and 2 correspond to high and mid elevations, respectively.

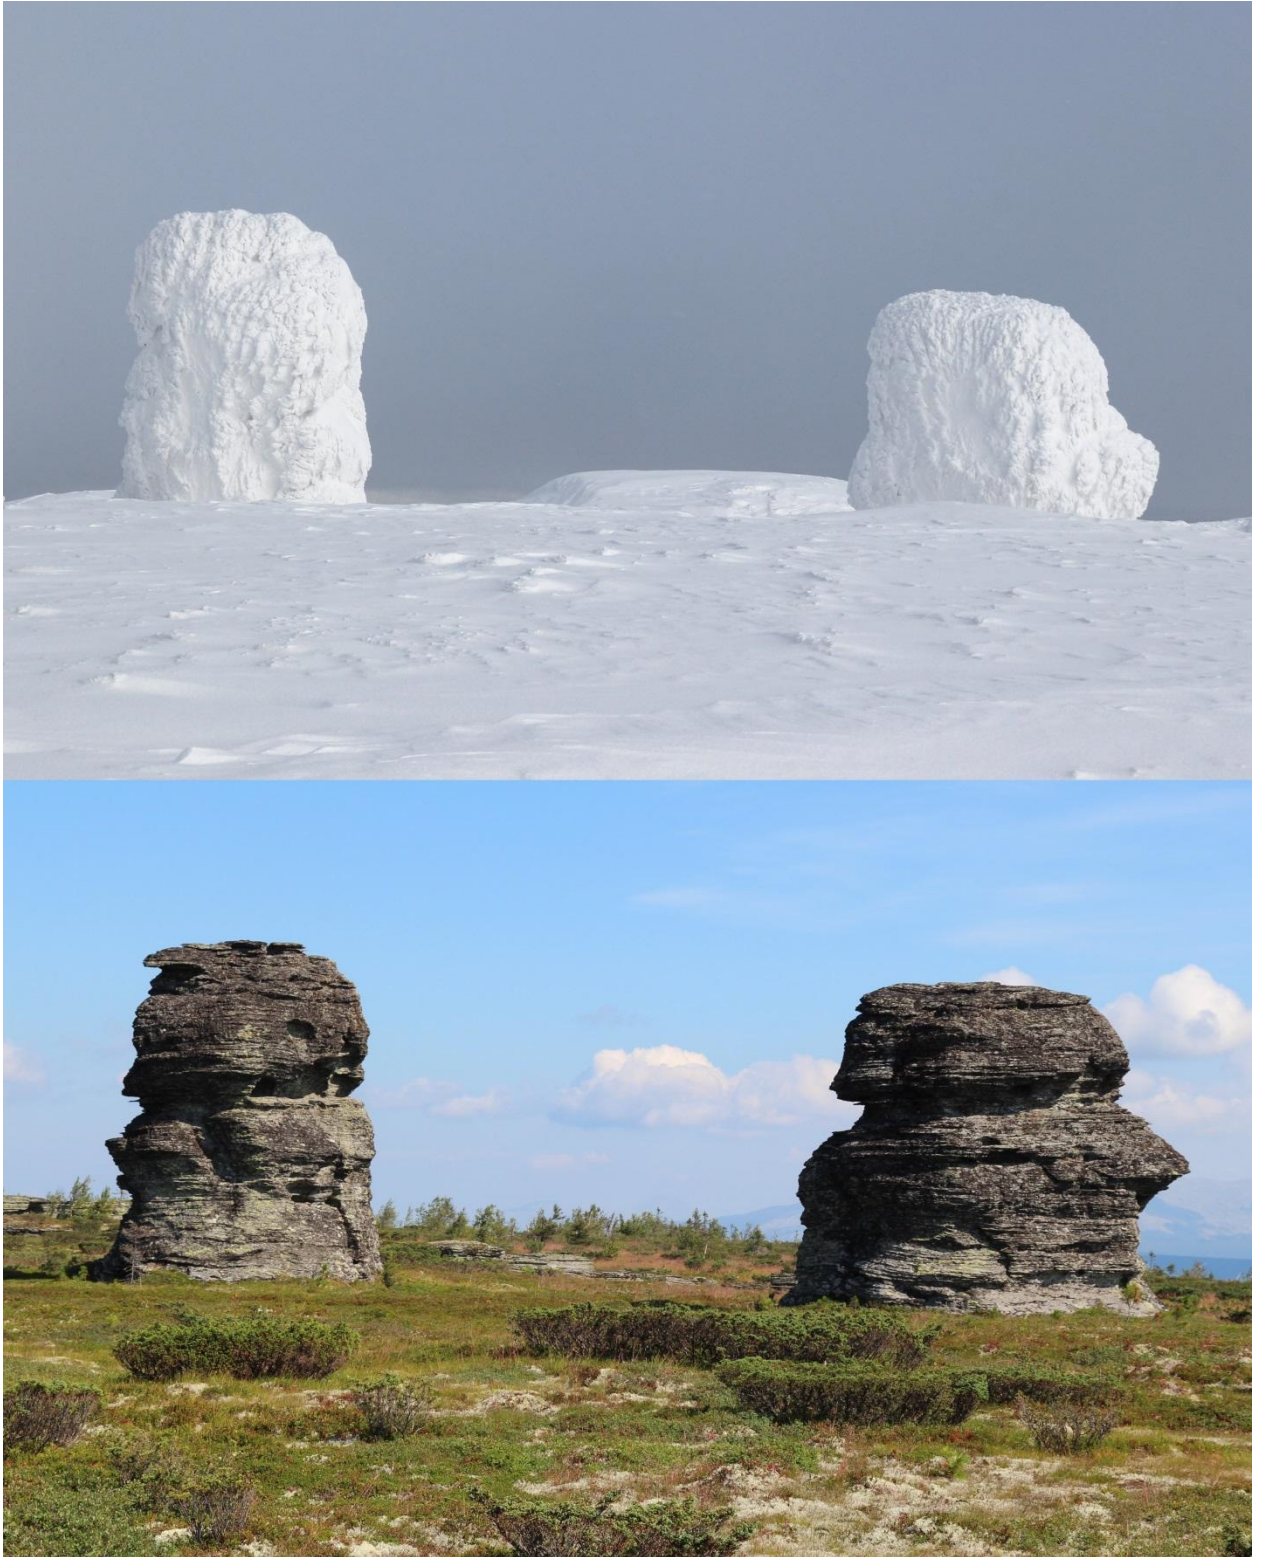

**Figure S3.** Landscape photographs taken on Zyryanovka (Northern Urals) in different seasons of the year.

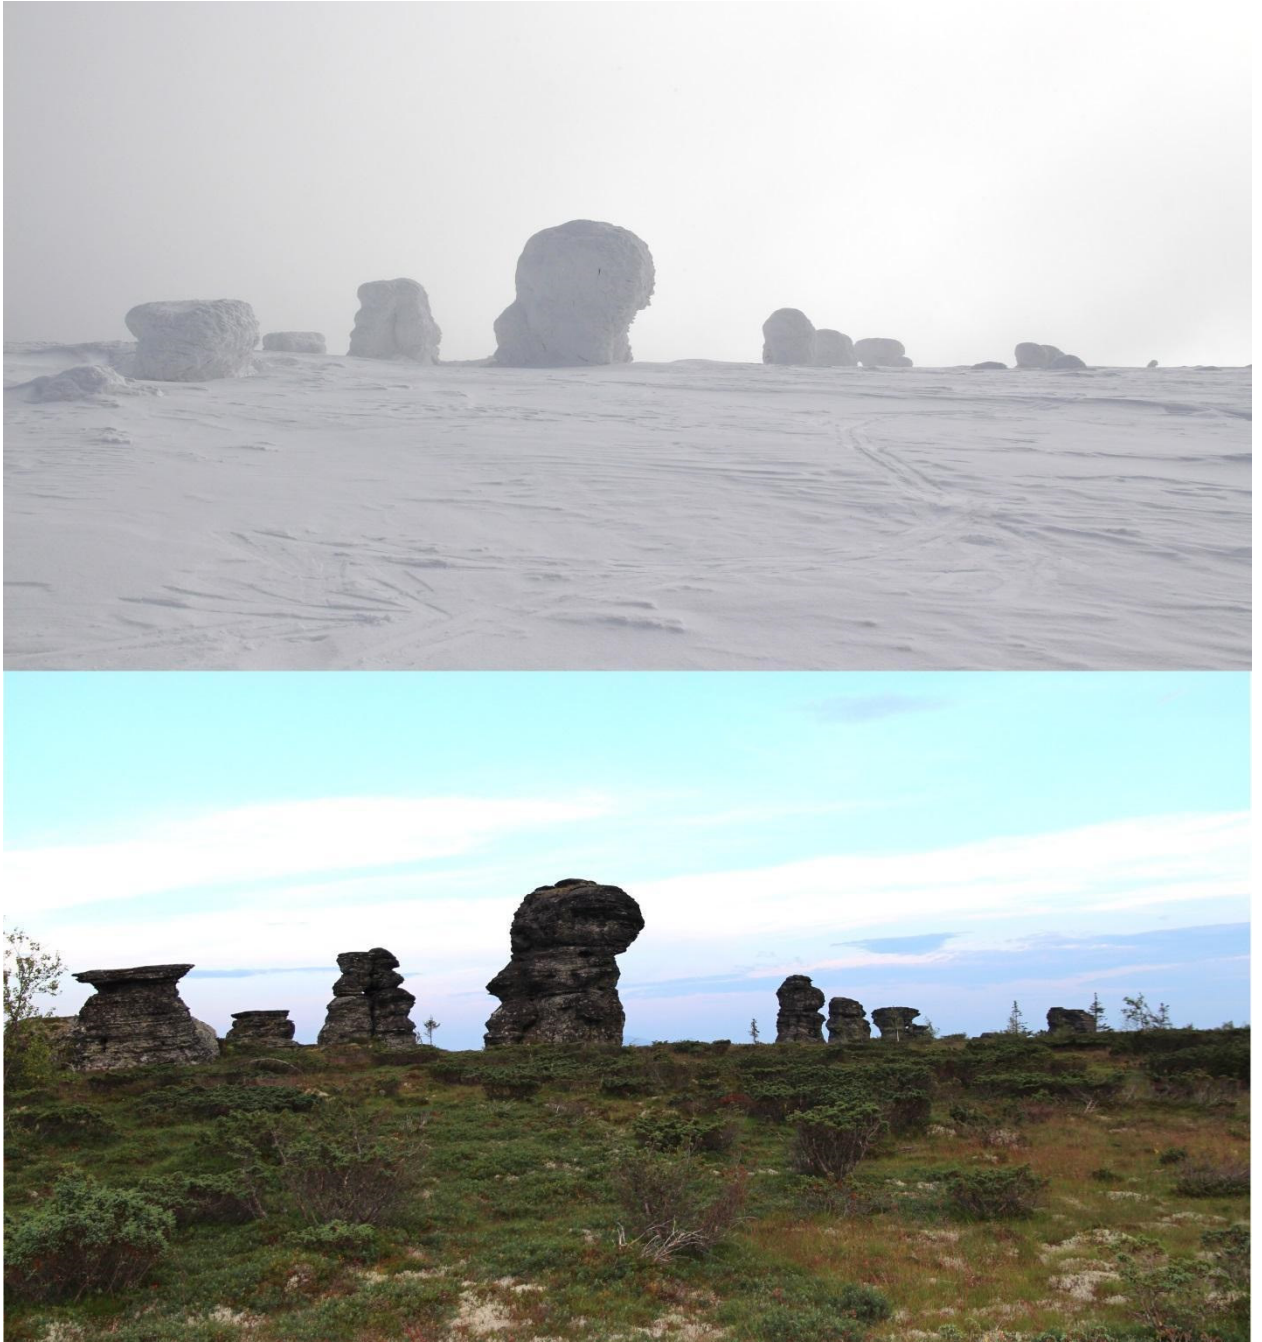

**Figure S4.** Landscape photographs taken on Zyryanovka (Northern Urals) in different seasons of the year.

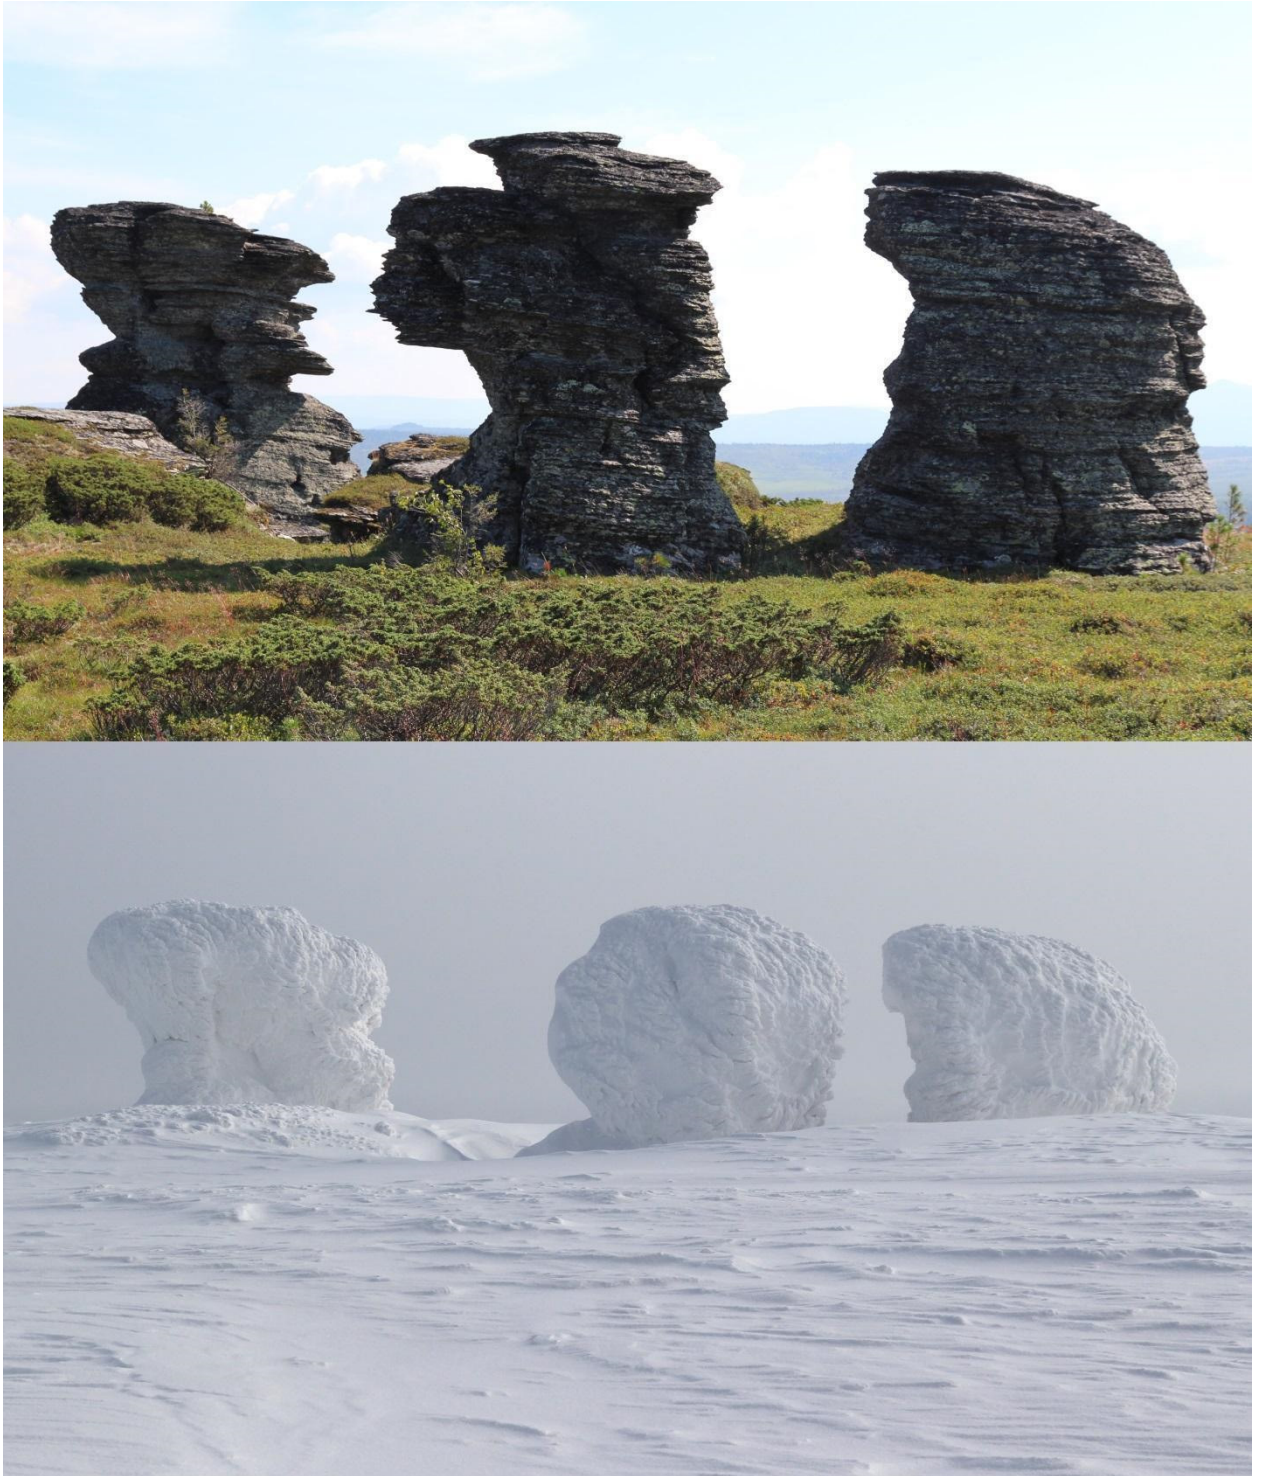

**Figure S5.** Landscape photographs taken on Zyryanovka (Northern Urals) in different seasons of the year.

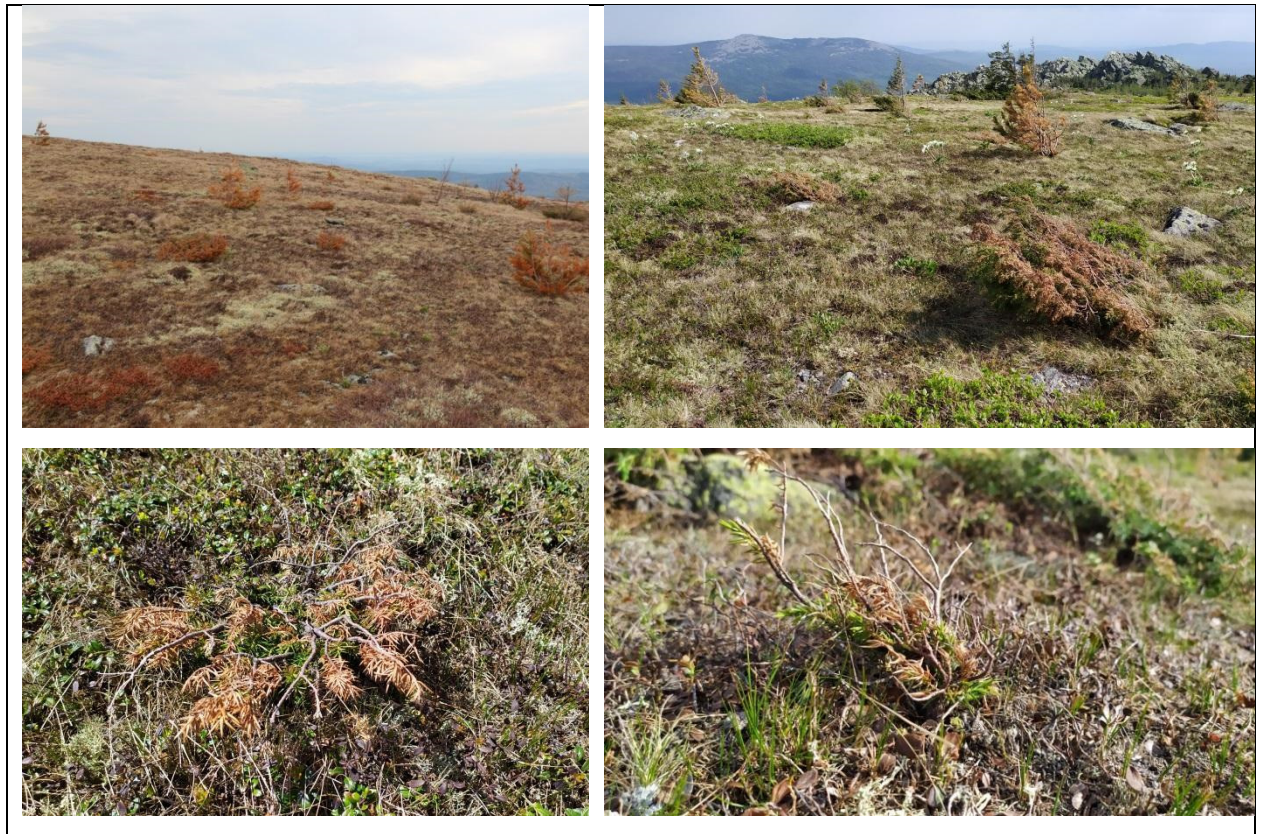

**Figure S6.** Massive dieback of *J. sibirica* on the convex slope of the Dalniy Taganay, Southern Urals.
